# Supplementary material for: One-pot synthesized core/shell structured zeolite@copper catalysts for selective hydrogenation of ethylene carbonate to methanol and ethylene glycol
Source: Royal Society of Chemistry journal article supplement (doi:10.1039/c9gc01726g), 2019-01-01
Supplement: c9gc01726g1.pdf [file c9gc01726g1.pdf]

# Supporting Information For

## **One-pot Synthesized Core/Shell Structured Zeolite@Copper Catalysts for Selective Hydrogenation of Ethylene Carbonate to Methanol and Ethylene Glycol**

Yu Ding, Jingxia Tian, Wei Chen, Yejun Guan, Hao Xu, Xiaohong Li,\* Haihong  
Wu,\* and Peng Wu\*

*Shanghai Key Laboratory of Green Chemistry and Chemical Processes, School of  
Chemistry and Molecular Engineering, East China Normal University, North  
Zhongshan Rd. 3663, Shanghai 200062, PR China*

*E-mail: pwu@chem.ecnu.edu.cn (P. Wu), hhwu@chem.ecnu.edu.cn (H. Wu),  
xhli@chem.ecnu.edu.cn (X. Li).*

*Tel/Fax: 86-21-62232292*

## **Experimental**

### **Synthesis of the Si-rich Beta-D and MOR-D**

The high silica beta zeolite was obtained by dealumination of a commercial H-Beta aluminosilicate with a Si/Al molar ratio of 11, which was purchased from Shanghai Xinnian Petrochemical Additives Co., Ltd. The dealumination treatment was according to previous reported method.<sup>1</sup> The H-Beta zeolite was refluxed in 13 M HNO<sub>3</sub> solution with a liquid-to-solid mass ratio of 50 at 140 °C for 24 h. The product was recovered by centrifugation, washed with deionized water, dried at 100 °C overnight, and further calcined at 550 °C for 6 h, giving rise to Si-rich Beta (Si/Al ratio of 545) denoted as Beta-D. The high silica MOR was obtained by dealumination of a commercial mordenite with a Si/Al molar ratio of 7.8, which was purchased from Shanghai Fine Chemical Co., China. After refluxed in 6 M HNO<sub>3</sub> solution with a liquid-to-solid mass ratio of 50 for 24 h, the treated zeolite was subsequently filtrated and washed with deionized water several times. The zeolite was then dried at 100 °C overnight, and then calcined in air at 550 °C for 6 h. This zeolite was subjected to acid refluxing again, resulting in a Si-rich MOR (Si/Al ratio of 201) denoted as MOR-D.

### **Synthesis of Silicalite-1 Zeolites with Larger Crystal Sizes**

For control experiment, Silicalite-1 samples with larger crystal sizes were also hydrothermally synthesized.

S-1-340 with average size of 340 nm was hydrothermally synthesized from TEOS using TPAOH as OSDA. The synthetic gel was prepared with molar compositions of 1.0 SiO<sub>2</sub> : 0.18 TPAOH: 18 H<sub>2</sub>O. After stirring for 1 h at room temperature, the gel

was crystallized in a Teflon-lined steel autoclave at 170 °C for 2 days. The S-1-340 products were collected by filtration followed by washing with distilled water several times, dried at 100 °C overnight, and then calcined in air at 550 °C for 6 h to remove the organic template.

Silicalite-1-4800 with average size of 4800 nm was hydrothermally synthesized from fumed silica and using TPAOH as OSDA. The synthetic gel was prepared with molar compositions of 1.0 SiO<sub>2</sub> : 0.18 TPAOH : 18 H<sub>2</sub>O. After stirring for 1 hours at room temperature, the gel was crystallized in a Teflon-lined steel autoclave at 170 °C for 2 days. The S-1-4800 products were collected by filtration followed by washing with distilled water several times, dried at 100 °C overnight, and then calcined in air at 550 °C for 6 h to remove the organic template.

S-1-30000 with size of average 30000 nm was hydrothermally synthesized from colloidal silica (30 wt.%) using TPAOH and TPABr as co-structure-directing agents. The synthetic gels were prepared with molar compositions of 1.0 SiO<sub>2</sub>: 0.02 TPAOH : 0.01 TPABr : 12 H<sub>2</sub>O. After stirring for 12 hours at room temperature, the gel were crystallized in a Teflon-lined steel autoclave at 170 °C for 3 days. The S-1-30000 products were collected by filtration followed by washing with distilled water several times, dried at 100 °C overnight, and then calcined in air at 550 °C for 6 h to remove the organic template.

### **Catalytic performance**

The MeOH balance was calculated as follows:

$$\text{MeOH balance (\%)} = \frac{\text{Sel}_{\text{MeOH}} + \text{Sel}_{\text{CO}} + \text{Sel}_{\text{CO}_2}}{\text{Sel}_{\text{EG}}} \times 100\%$$

**Table S1.** Reaction results obtained for the selective hydrogenation of EC with different zeolite@Cu catalysts. <sup>a</sup>

| Catalyst  | Topology                                                                            | Channel dimension<br>Pore window | Cu loading<br>(wt.%) | EC conv.<br>(%) | Sel. <sup>b</sup> (%) |    |
|-----------|-------------------------------------------------------------------------------------|----------------------------------|----------------------|-----------------|-----------------------|----|
|           |                                                                                     |                                  |                      |                 | MeOH                  | EG |
| S-1@Cu    | MFI                                                                                 | 3D, 10-R                         | 21.4                 | 99              | 93                    | 99 |
|           | 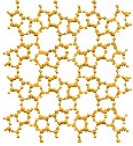   |                                  |                      |                 |                       |    |
| Beta-D@Cu | *BEA                                                                                | 3D, 12-R                         | 22.3                 | 97              | 71                    | 99 |
|           |   |                                  |                      |                 |                       |    |
| MOR-D@Cu  | MOR                                                                                 | 2D, 12*8-R                       | 21.8                 | 99              | 8                     | 45 |
|           |  |                                  |                      |                 |                       |    |

<sup>a</sup> Reduction conditions: 250 °C, 4 h, H<sub>2</sub> (60 mL min<sup>-1</sup>); reaction conditions: 1 g catalyst, 180 °C, 4 h, 4 MPa H<sub>2</sub>, GHSV<sub>H<sub>2</sub></sub> = 2400, WHSV<sub>EC</sub> = 0.13.

<sup>b</sup> Main by-products: ethanol, CO or CO<sub>2</sub>.

*At comparable Cu loadings, MFI-type silicate is obviously superior to \*BEA and MOR as the support of Cu NPs for the selective EC hydrogenation, in particular in terms of MeOH selectivity.*

**Table S2.** The MeOH balance and selectivity of gaseous products in the selective hydrogenation of EC with different reduction temperature on S-1-210@Cu-21.4.<sup>a</sup>

| Catalyst        | Reduction temperature | MeOH balance (%) | Sel. (%) |     |                 |
|-----------------|-----------------------|------------------|----------|-----|-----------------|
|                 |                       |                  | MeOH     | CO  | CO <sub>2</sub> |
| S-1-210@Cu-21.4 | 150                   | 97               | 88       | 2.6 | 6.4             |
| S-1-210@Cu-21.4 | 250                   | 97               | 93       | 1.1 | 2.9             |
| S-1-210@Cu-21.4 | 350                   | 97               | 87       | 2.2 | 7.8             |
| S-1-210@Cu-21.4 | 450                   | 96               | 67       | 4.3 | 24.7            |

<sup>a</sup> Reduction conditions: 4 h, H<sub>2</sub> (60 mL min<sup>-1</sup>); reaction conditions: 1 g catalyst, 180

°C, 4 h, 4 MPa H<sub>2</sub>, GHSV<sub>H2</sub> = 2400, WHSV<sub>EC</sub> = 0.13.

**Table S3.** The batch-wise reaction results obtained for the selective hydrogenation of EC with different solvents over S-1@Cu catalysts.<sup>a</sup>

| Catalyst | Solvent             | Cu<br>(wt.%) | EC conv.<br>(%) | Sel. (%) |    |
|----------|---------------------|--------------|-----------------|----------|----|
|          |                     |              |                 | MeOH     | EG |
| S-1@Cu   | 1, 4-dioxane        | 21.4         | 98              | 74       | 99 |
| S-1@Cu   | ethanol             | 21.4         | 97              | 9        | 60 |
| S-1@Cu   | gamma valerolactone | 21.4         | 34              | 1        | 57 |

<sup>a</sup> Reduction conditions: 250 °C, 4 h, H<sub>2</sub> (60 mL min<sup>-1</sup>); reaction conditions: 0.176 g catalyst, 10 mL of 10 wt.% EC in 1,4-dioxane, 180 °C, 4 h, 4 MPa H<sub>2</sub>.

**Table S4.** Representative Cu-Silica-based catalysts and their catalytic properties for the selective hydrogenation of EC.

| No. | Catalyst                                | T<br>(°C) | P <sub>H<sub>2</sub></sub><br>(MPa) | Cu<br>(wt.%) | EC conv.<br>(%) | Sel. (%) |      | Lifetime<br>(h) | Ref.      |
|-----|-----------------------------------------|-----------|-------------------------------------|--------------|-----------------|----------|------|-----------------|-----------|
|     |                                         |           |                                     |              |                 | MeOH     | EG   |                 |           |
| 1   | 50Cu/HMS <sup>a</sup>                   | 180       | 3                                   | 44.6         | 100.0           | 74.0     | 99.0 | >100            | 2         |
| 2   | 70%Cu-SiO <sub>2</sub> -PG <sup>b</sup> | 160       | 6                                   | 56.0         | 99.0            | 97.0     | 98.0 | >80             | 3         |
| 3   | Cu/SBA-15                               | 200       | 5                                   | 10.0         | 100.0           | 62.3     | 94.7 | -               | 4         |
| 4   | 10%Cu/SiO <sub>2</sub> -AE <sup>c</sup> | 180       | 5                                   | 9.5          | 100.0           | 70.8     | 98.0 | -               | 5         |
| 5   | 0.7Cu/MCM-41                            | 180       | 3                                   | 33.3         | 97.0            | 70.0     | 98.0 | <100            | 6         |
| 6   | 3.0-CuSi-NAM <sup>d</sup>               | 180       | 3                                   | 3.1          | 99.0            | 60.0     | 97.0 | -               | 7         |
| 7   | Cu-Mg-Zr/SiO <sub>2</sub>               | 180       | 4                                   | 60.0         | 99.0            | 82.0     | 99.0 | 208             | 8         |
| 8   | S-1@Cu                                  | 180       | 4                                   | 21.4         | 99.0            | 93.0     | 99.0 | >350            | This work |

<sup>a</sup> The Cu nanoparticles were supported on HMS-type mesoporous silica.

<sup>b</sup> Prepared by a precipitation-gel (PG) method.

<sup>c</sup> Prepared by ammonia evaporation (AE) method.

<sup>d</sup> CuSi-NAM is short for Cu/SiO<sub>2</sub> nanoarray monolithic catalyst.

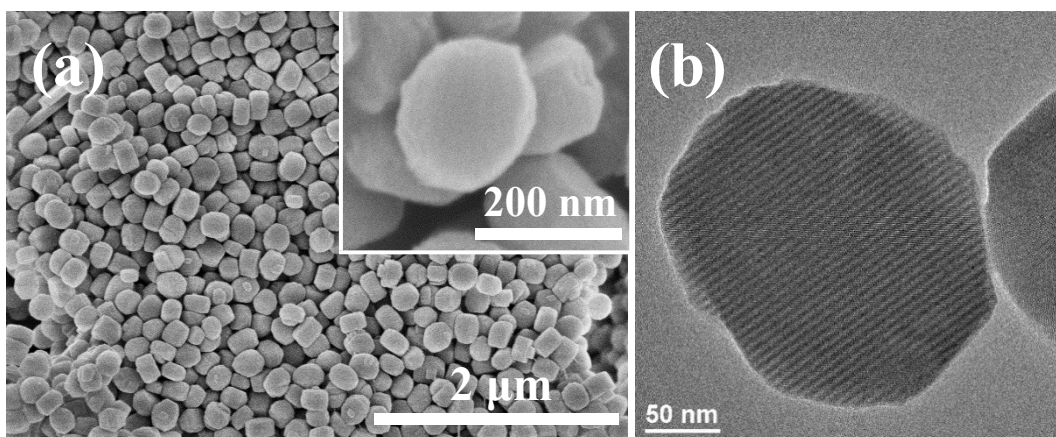

**Fig. S1** SEM images (a) and TEM image (b) of S-1-210.

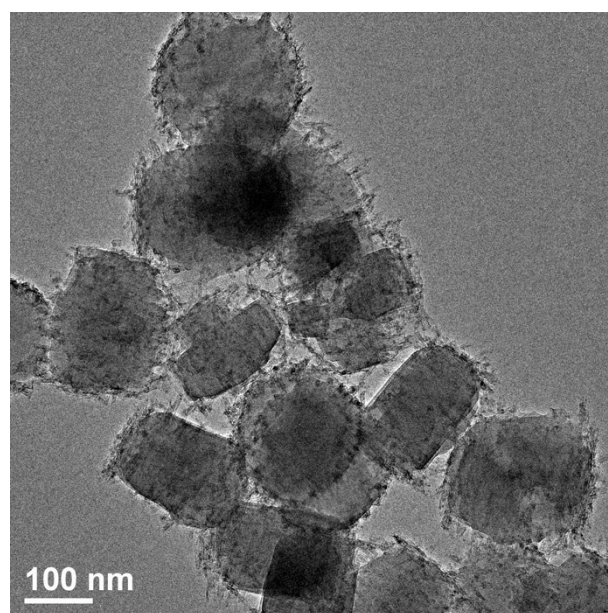

**Fig. S2** TEM images of S-1@Cu with 21.4 wt.% Cu loading.



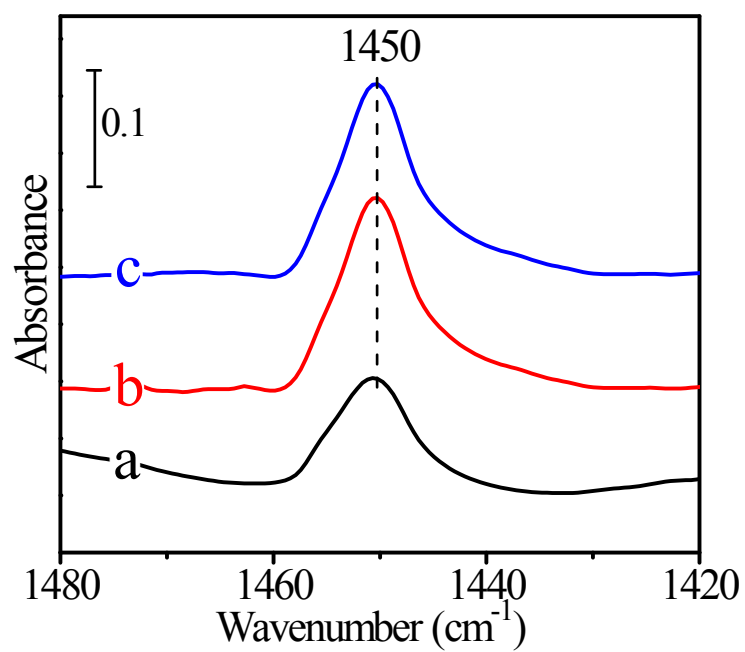

**Fig. S3** Pyridine-adsorbed FTIR spectra of S-1@Cu (a), Beta-D@Cu (b) and MOR-D@Cu (c). The pyridine desorption was carried out by evacuation at 150 °C for 30 min.

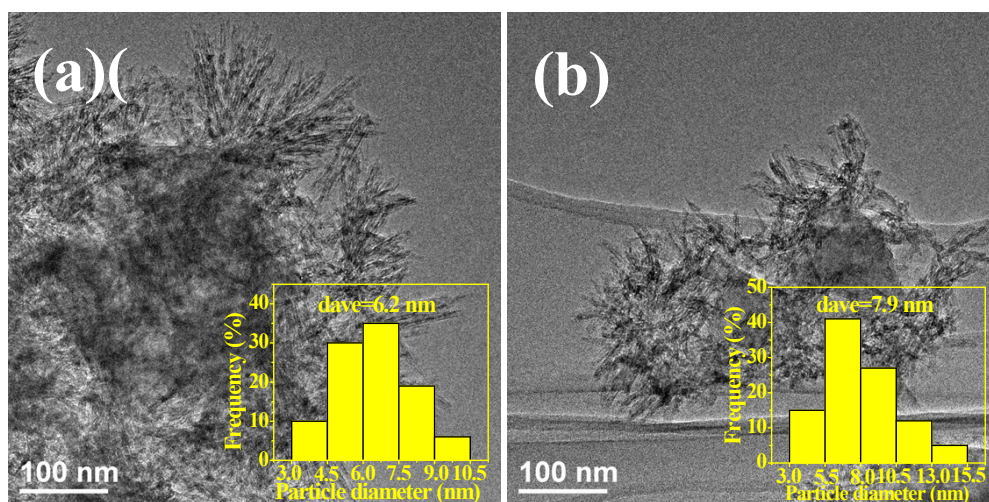

**Fig. S4** TEM images of Beta-D@Cu (a) and MOR-D@Cu (b) reduced at 250 °C. The insets show the distribution of Cu NPs sizes

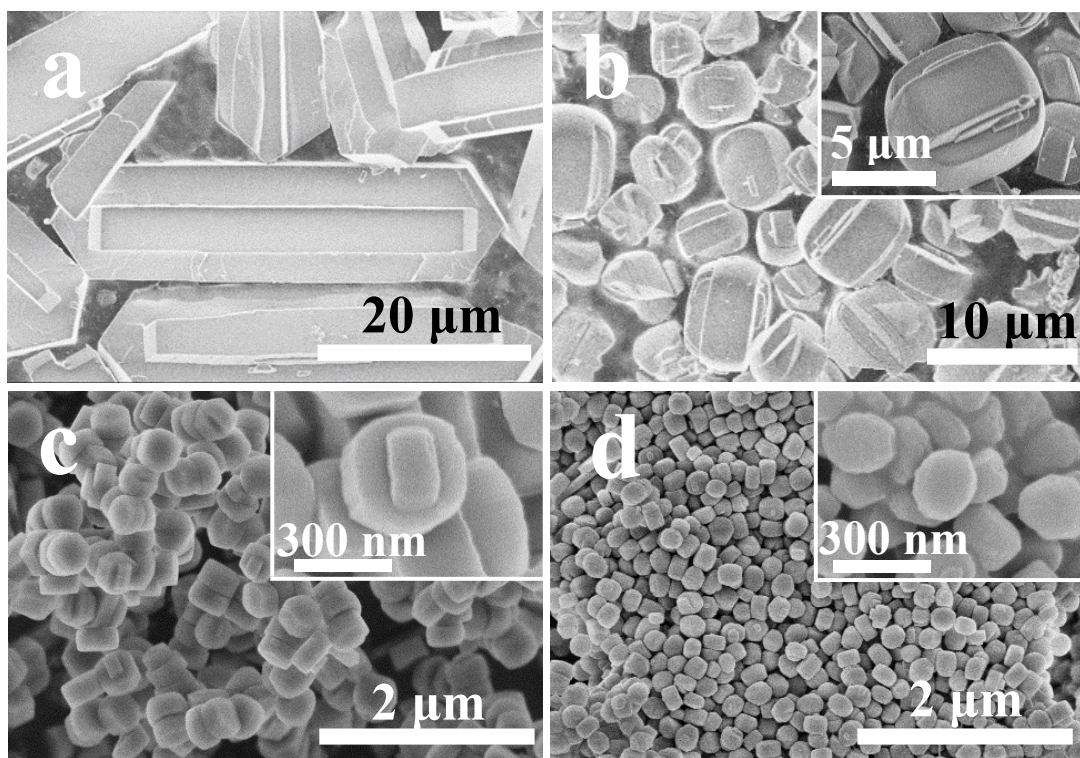

**Fig. S5** SEM images of S-1-30000 (a), S-1-4800 (b), S-1-340 (c) and S-1-210 (d) samples.

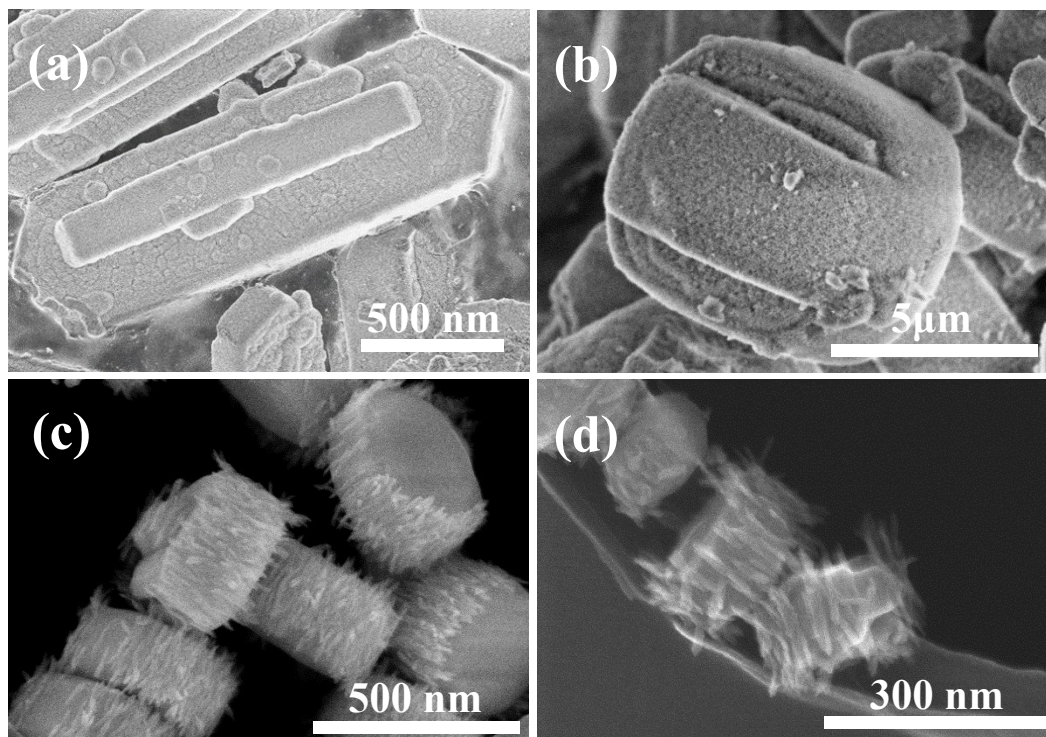

**Fig. S6** SEM images of S-1-30000@CuSiO<sub>3</sub> (a), S-1-4800@CuSiO<sub>3</sub> (b), S-1-340@CuSiO<sub>3</sub> (c) and S-1-210@CuSiO<sub>3</sub> (d).

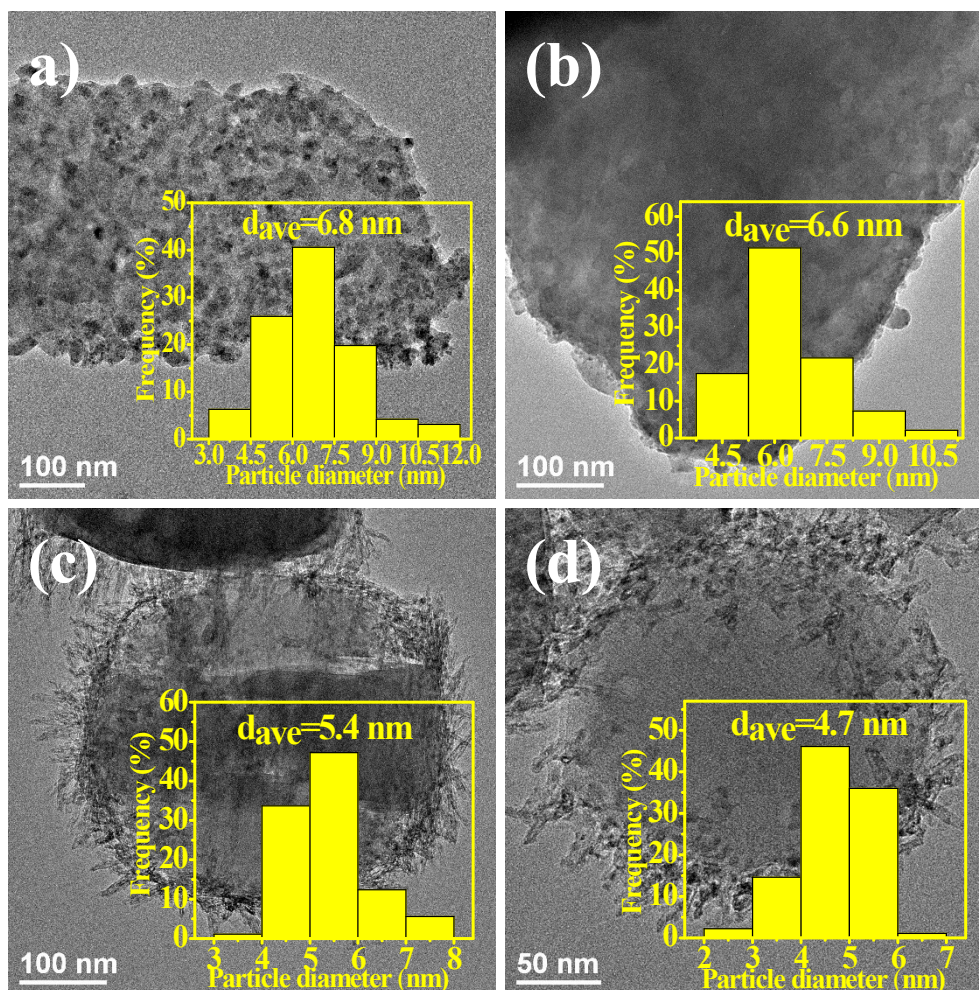

**Fig. S7** TEM images of S-1-30000@Cu (a), S-1-4800@Cu (b), S-1-340@Cu (c) and S-1-210@Cu (d). The insets show the distribution of Cu NPs sizes.

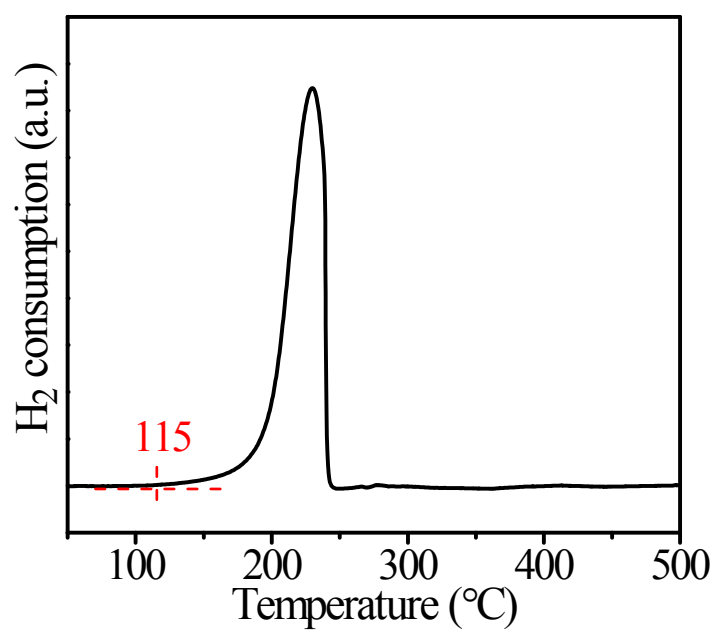

**Fig. S8** H<sub>2</sub>-TPR profile of S-1-210@CuSiO<sub>3</sub> catalyst.

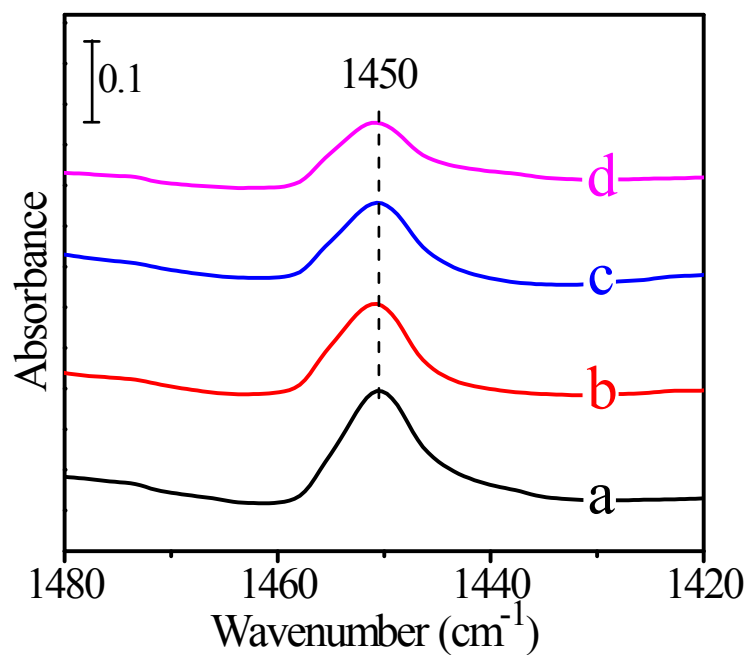

**Fig. S9** Pyridine-adsorbed FTIR spectra of the S-1-210@Cu catalysts after reduced at 150 °C (a), 250 °C (b), 350 °C (c) and 450 °C (d), respectively. The pyridine desorption was carried out by evacuation at 150 °C for 30 min.

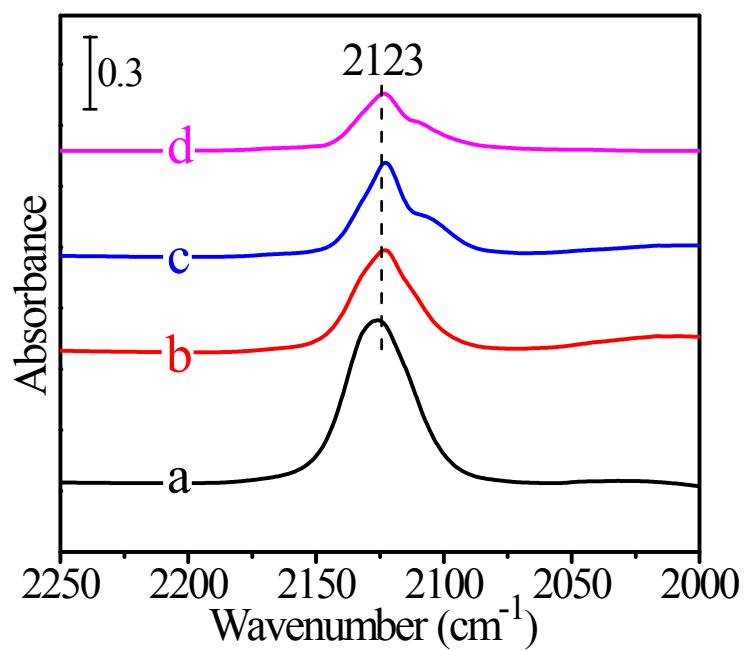

**Fig. S10** FTIR spectra of CO adsorbed on the S-1-210@Cu catalysts after reduced at 150 °C (a), 250 °C (b), 350 °C (c) and 450 °C (d), respectively.



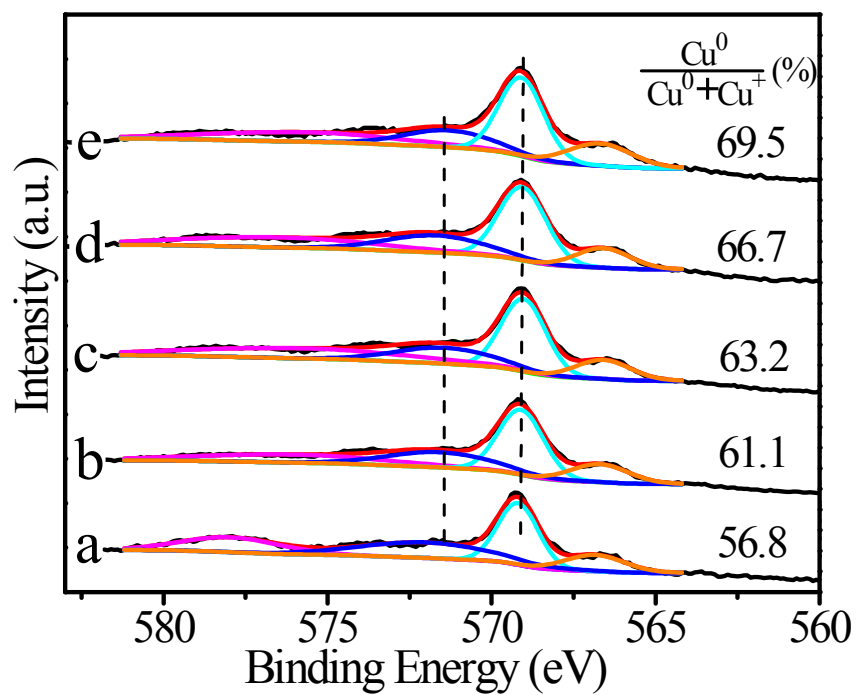

**Fig. S11** Cu LMM Auger electron spectra of S-1-210@Cu-13.6 (a), S-1-210@Cu-17.4 (b), S-1-210@Cu-21.4 (c), S-1-210@Cu-25.2 (d) and S-1-210@Cu-31.7 (e) after reduced at 250 °C for 4 h.

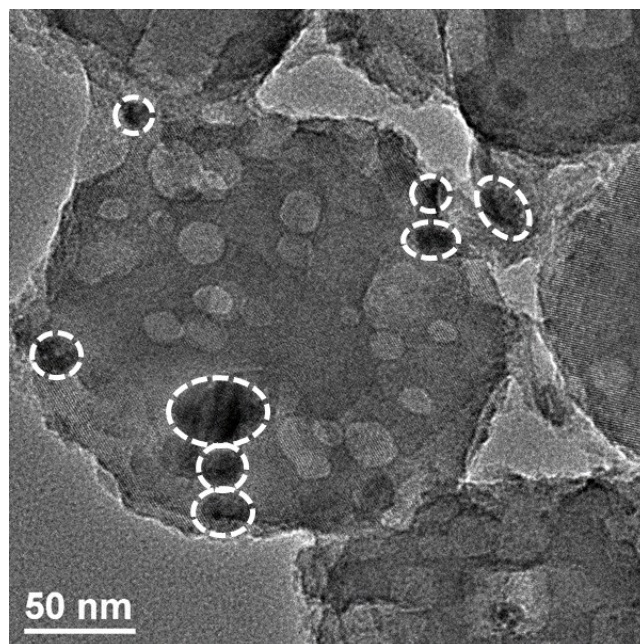

**Fig. S12** TEM image of the used S-1-210@Cu-21.4 catalyst in EC hydrogenation for 550 h.

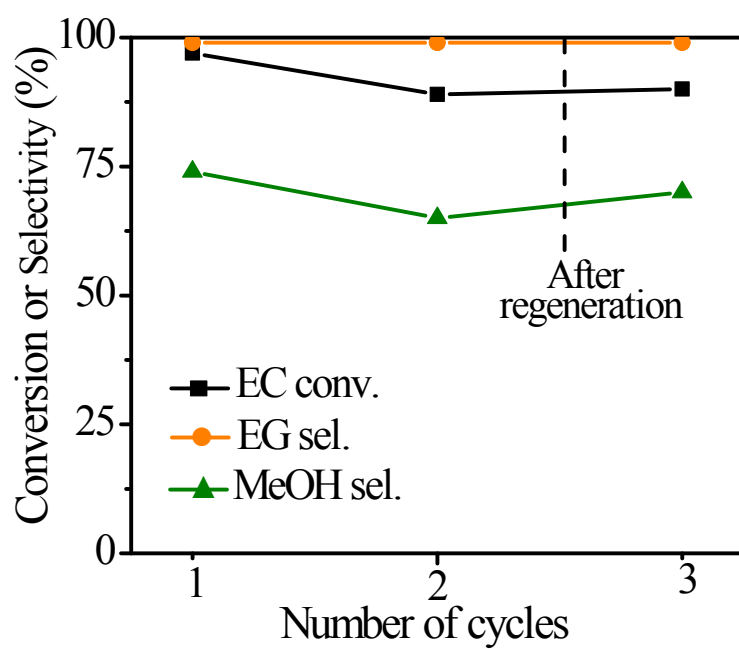

**Fig. S13** The recycling use of S-1-210@Cu-21.4 in a batch reactor for selective hydrogenation of EC to MeOH and EG. Reaction conditions: 0.176 g catalyst, 10 mL of 10 wt.% EC in 1,4-dioxane, 180 °C, 4 h, 4 MPa H<sub>2</sub>. Reduction conditions: 250 °C, 4 h, H<sub>2</sub> (60 mL min<sup>-1</sup>).

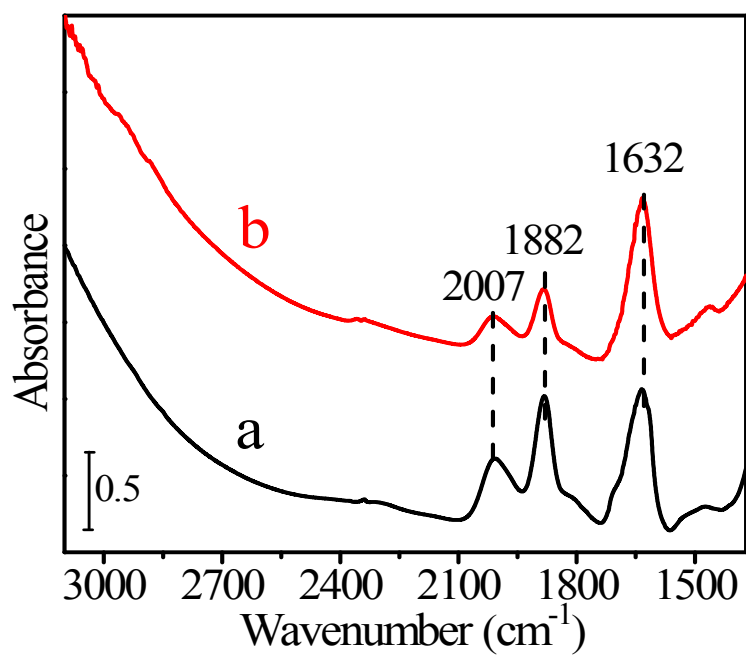

**Fig. S14** FTIR spectra of S-1-210 (a) and S-1-210@Cu-21.4.

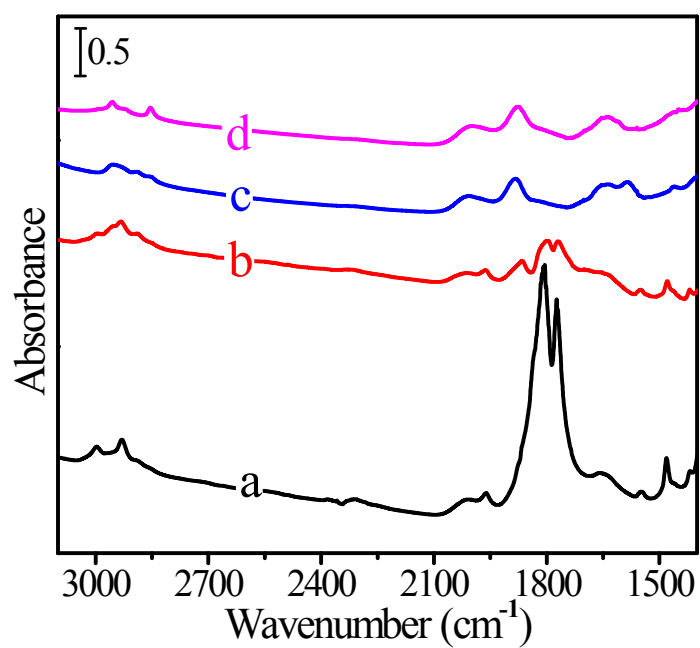

**Fig. S15** FTIR spectra of EC (a), EG (c) and MeOH (d) adsorbed on S-1-210@Cu-21.4 under N<sub>2</sub> atmosphere at 180 °C and the spectrum for *in-situ* EC hydrogenation at 180 °C on S-1-210@Cu-21.4 under 5% H<sub>2</sub>/N<sub>2</sub> atmosphere (b).

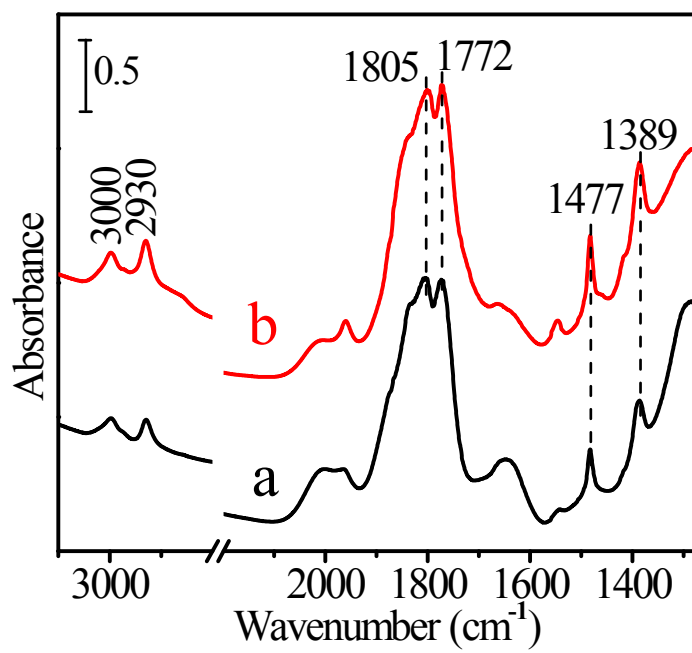

**Fig. S16** FTIR spectra for the *in-situ* EC hydrogenation at 180 °C on S-1-210 (a) and S-1-210@CuSiO<sub>3</sub>-21.4 (b) under 5% H<sub>2</sub>/N<sub>2</sub> atmosphere.

## References

1. Z. Zhu, H. Xu, J. Jiang, H. Wu, P. Wu, *ACS Appl. Mater. Interfaces*, 2017, **9**, 27273-27283.
2. X. Chen, Y. Y. Cui, C. Wen, B. Wang, W-L. Dai, *Chem. Commun.*, 2015, **51**, 13776-13778.
3. H. L. Liu, Z. W. Huang, Z. B. Han, K. L. Ding, H. C. Liu, C. G. Xia, J. Chen, *Green Chem.*, 2015, **17**, 4281-4290.
4. F. J. Li, L. G. Wang, X. Han, P. He, Y. Cao, H. Q. Li, *RSC Adv.*, 2016, **6**, 45894-45906.
5. F. J. Li, L. G. Wang, X. Han, P. He, Y. Cao, H. Q. Li, *Int. J. Hydrogen Energy*, 2017, **42**, 2144-2156.
6. F. Deng, N. Li, S. Y. Tang, C. J. Liu, H. R. Yue, B. Liang, *Chem. Eng. J.*, 2018, **334**, 1943-1953.
7. M. Zhou, Y. Shi, K. Ma, S. Tang, C. Liu, H. Yue, B. Liang, *Ind. Eng. Chem. Res.*, 2018, **57**, 1924-1934.
8. J. Tian, W. Chen, P. Wu, Z. Zhu, X. Li, *Catal. Sci. Technol.*, 2018, **8**, 2624-2635.
